# Supplementary material for: Detection of MET Gene Copy Number in Cancer Samples Using the Droplet Digital PCR Method
Source: PubMed Central journal article supplement (PMC4713204; doi:10.1371/journal.pone.0146784), 2016-01-14
Supplement: pone.0146784.s001.pdf [file pone.0146784.s001.pdf]

S1 Table . Comparison of *MET* copy number detected by ddPCR versus by SNP 6.0

| Cell line   | Tissue | MET CN (ddPCR) | MET CN (SNP6.0) |
|-------------|--------|----------------|-----------------|
| Hs746T      | GC     | 29             | 13              |
| MKN45       | GC     | 22.2           | 14              |
| SNU-5       | GC     | 15.6           | 8               |
| SNU-620     | GC     | 41.8           | 14              |
| MKN1        | GC     | 2.13           | 4               |
| AZ521       | GC     | 1.81           | 2               |
| NUGC-4      | GC     | 5.7            | 4               |
| SNU-16      | GC     | 2.49           | 3               |
| BEL-7402    | HCC    | 1.39           | 2               |
| HCCC9810    | HCC    | 5.64           | 5               |
| Hep3B       | HCC    | 2.99           | 3               |
| HepG2       | HCC    | 2.26           | 2               |
| HLE         | HCC    | 1.07           | 2               |
| HLF         | HCC    | 1.29           | 2               |
| HuCCCT1     | HCC    | 1.65           | 3               |
| HUH-1       | HCC    | 2.52           | 3               |
| HUH-28      | HCC    | 1.39           | 2               |
| HUH6 clone5 | HCC    | 2.05           | 3               |
| HUH-7       | HCC    | 2.98           | 3               |
| JHH-1       | HCC    | 2.85           | 6               |
| JHH-2       | HCC    | 3.52           | 5               |
| JHH-4       | HCC    | 2.15           | 5               |
| JHH-5       | HCC    | 1.75           | 3               |
| JHH-6       | HCC    | 4.01           | 4               |
| JHH-7       | HCC    | 2.17           | 4               |
| Li-7        | HCC    | 1.95           | 3               |
| NOZ         | HCC    | 1.62           | 3               |
| OCUG-1      | HCC    | 5.52           | 8               |
| OZ          | HCC    | 2.63           | 3               |
| PLC-PRF-5   | HCC    | 3.56           | 4               |
| QGY-7701    | HCC    | 1.42           | 4               |
| QGY-7703    | HCC    | 1.53           | 3               |
| SK-HEP-2    | HCC    | 2.49           | 4               |
| SMMC-7721   | HCC    | 1.63           | 2               |
| SNU-182     | HCC    | 1.41           | 3               |
| SNU-354     | HCC    | 2.11           | 4               |
| SNU-368     | HCC    | 2.82           | 5               |
| SNU-387     | HCC    | 2.35           | 3               |
| SNU-398     | HCC    | 2.68           | 3               |
| SNU-423     | HCC    | 1.92           | 4               |
| SNU-449     | HCC    | 2.77           | 3               |
| SNU-475     | HCC    | 2.11           | 3               |
| SNU-739     | HCC    | 2.11           | 4               |
| SNU-761     | HCC    | 2.36           | 2               |
| SNU-878     | HCC    | 2.31           | 3               |
| SNU-886     | HCC    | 2.68           | 4               |
