# Supplementary material for: Detection of MET Gene Copy Number in Cancer Samples Using the Droplet Digital PCR Method
Source: PubMed Central journal article supplement (PMC4713204; doi:10.1371/journal.pone.0146784), 2016-01-14
Supplement: pone.0146784.s002.pdf [file pone.0146784.s002.pdf]

S2 Table. Comparison of *MET* copy number detected by ddPCR versus by FISH

| Code | Model   | Tissue | MET CN (ddPCR) | MET/CEP7 ratio | Positive/Negative (P/N) |
|------|---------|--------|----------------|----------------|-------------------------|
| 1    | GAPF438 | GC     | 1.89           | 1.13           | N                       |
| 2    | GAPF344 | GC     | 2.2            | 1.02           | N                       |
| 3    | GAPF528 | GC     | 17.01          | 1.13           | N                       |
| 4    | GAPF308 | GC     | 1.61           | 1.02           | N                       |
| 5    | GAPF559 | GC     | 5.92           | 6.79           | P                       |
| 6    | GAPF381 | GC     | 12.98          | 5.46           | P                       |
| 7    | GAPF478 | GC     | 1.77           | 1              | N                       |
| 8    | GAPF847 | GC     | 1.63           | 1.07           | N                       |
| 9    | GAPF510 | GC     | 1.184          | 1.02           | N                       |
| 10   | GAPF854 | GC     | 1.97           | 0.95           | N                       |
| 11   | GAPF451 | GC     | 1.89           | 0.97           | N                       |
| 12   | GAPF403 | GC     | 1.35           | 0.95           | N                       |
| 13   | GAPF493 | GC     | 0.334          | 0.98           | N                       |
| 14   | GAPF375 | GC     | 2.59           | 1.09           | N                       |
| 15   | GAPF916 | GC     | 1.501          | 1.07           | N                       |
| 16   | GAPF304 | GC     | 1.68           | 0.8            | N                       |
| 17   | GAPF339 | GC     | 2.24           | 1              | N                       |
| 18   | GAPF509 | GC     | 11.1           | 0.98           | N                       |
| 19   | GAPF570 | GC     | 2.37           | 1.1            | N                       |
| 20   | GAPF843 | GC     | 1.352          | 1.11           | N                       |
| 21   | GAPF439 | GC     | 6.82           | 4.3            | P                       |
| 22   | GAPF526 | GC     | 3.34           | 1.24           | N                       |
| 23   | GAPF811 | GC     | 1.331          | 0.97           | N                       |
| 24   | GAPF405 | GC     | 2.78           | 1.07           | N                       |
| 25   | GAPF436 | GC     | 1.63           | 1.05           | N                       |
| 26   | GAPF374 | GC     | 3.05           | 1.14           | N                       |
| 27   | GAPF462 | GC     | 1.249          | 1.03           | N                       |
| 28   | GAPF480 | GC     | 2              | 1.19           | N                       |
| 29   | GAPF516 | GC     | 3.43           | 1.05           | N                       |
| 30   | GAPF563 | GC     | 1.246          | 0.97           | N                       |
| 31   | GAPF878 | GC     | 2.57           | 1.06           | N                       |
| 32   | GAPF525 | GC     | 3.35           | 1.24           | N                       |
| 33   | GAPF534 | GC     | 2.05           | 1.11           | N                       |
| 34   | GAPF599 | GC     | 1.6            | 1.02           | N                       |
| 35   | GAPF461 | GC     | 1.359          | 0.97           | N                       |
| 36   | GAPF535 | GC     | 3.1            | 1.07           | N                       |
| 37   | GAPF383 | GC     | 21.2           | 6.13           | P                       |
| 38   | GAPF479 | GC     | 2.09           | 1.17           | N                       |
| 39   | GAPF907 | GC     | 0.805          | 1.1            | N                       |

| Code | Model   | Tissue | MET CN (ddPCR) | MET/CEP7 ratio | Positive/Negative (P/N) |
|------|---------|--------|----------------|----------------|-------------------------|
| 40   | GAPF455 | GC     | 1.4            | 1.07           | N                       |
| 41   | GAPF613 | GC     | 2.26           | 1.04           | N                       |
| 42   | GAPF591 | GC     | 1.092          | 0.88           | N                       |
| 43   | GAPF536 | GC     | 2.88           | 1.31           | N                       |
| 44   | GAPF553 | GC     | 1.63           | 1.08           | N                       |
| 45   | GAPF600 | GC     | 1.74           | 0.95           | N                       |
| 46   | GAPF547 | GC     | 2.63           | 1.32           | N                       |
| 47   | GAPF804 | GC     | 2.27           | 1              | N                       |
| 48   | GAPF846 | GC     | 1.57           | 1.18           | N                       |
| 49   | GAPF508 | GC     | 1.88           | 0.95           | N                       |
| 50   | GAPF562 | GC     | 1.54           | 1.03           | N                       |
| 51   | GAPF494 | GC     | 1.28           | 0.8            | N                       |
| 52   | GAPF512 | GC     | 1.28           | 0.89           | N                       |
| 53   | GAPF538 | GC     | 2.88           | 0.98           | N                       |
| 54   | GAPF801 | GC     | 0.841          | 0.97           | N                       |
| 55   | GAPF879 | GC     | 2.23           | 1.06           | N                       |
| 56   | GAPF580 | GC     | 2.48           | 1.03           | N                       |
| 57   | LIPF042 | HCC    | 1.56           | 1.05           | N                       |
| 58   | LIPF247 | HCC    | 1.6            | 1.28           | N                       |
| 59   | LIPF252 | HCC    | 1.76           | 1.06           | N                       |
| 60   | LIPF255 | HCC    | 1.89           | 1.42           | N                       |
| 61   | LIPF256 | HCC    | 2.7            | 1.06           | N                       |
| 62   | LIPF261 | HCC    | 4.11           | 1.18           | N                       |
| 63   | LIPF262 | HCC    | 2.01           | 1.02           | N                       |
| 64   | LIPF264 | HCC    | 1.177          | 1.33           | N                       |
| 65   | LIPF270 | HCC    | 1.69           | 1.14           | N                       |
| 66   | LIPF274 | HCC    | 0.929          | 0.9            | N                       |
| 67   | LIPF277 | HCC    | 2.8            | 1.73           | N                       |
| 68   | LIPF282 | HCC    | 0.83           | 0.62           | N                       |
| 69   | GAPF057 | GC     | 0.954          | 0.88           | N                       |
| 70   | GAPF069 | GC     | 1.78           | 1.03           | N                       |
| 71   | GAPF112 | GC     | 1.84           | 1.13           | N                       |
| 72   | GAPF115 | GC     | 1.54           | 0.97           | N                       |
| 73   | GAPF132 | GC     | 1.93           | 1.02           | N                       |
| 74   | GAPF147 | GC     | 1.51           | 1.1            | N                       |
| 75   | GAPF158 | GC     | 1.445          | 1              | N                       |
| 76   | GAPF161 | GC     | 2.03           | 1.09           | N                       |
| 77   | GAPF162 | GC     | 0.552          | 0.68           | N                       |
| 78   | GAPF170 | GC     | 0.205          | 1.11           | N                       |

Continued S2 Table. Comparison of *MET* copy number detected by ddPCR versus by FISH

| Code | Model   | Tissue | MET CN (ddPCR)    | MET/CEP7 ratio | Positive/Negative (P/N) |
|------|---------|--------|-------------------|----------------|-------------------------|
| 79   | GAPF187 | GC     | 2.61              | 0.98           | N                       |
| 80   | GAPF188 | GC     | 1.93              | 1.09           | N                       |
| 81   | GAPF190 | GC     | 2                 | 1.08           | N                       |
| 82   | GAPF195 | GC     | 0.864             | 0.89           | N                       |
| 83   | GAPF209 | GC     | 0.951             | 1.03           | N                       |
| 84   | GAPF210 | GC     | 2.66              | 1.3            | N                       |
| 85   | GAPF220 | GC     | 2.15              | 1.28           | N                       |
| 86   | GAPF221 | GC     | 2.54              | 0.96           | N                       |
| 87   | GAPF101 | GC     | 0.00022 (no call) | 1              | N                       |
| 88   | GAPF238 | GC     | 3.22              | 1.45           | N                       |
| 89   | GAPF241 | GC     | 1.84              | 0.83           | N                       |
| 90   | GAPF118 | GC     | 1.65              | 1.05           | N                       |
| 91   | GAPF250 | GC     | 1.525             | 1.02           | N                       |
| 92   | LIPF335 | HCC    | 1.8               | 1.3            | N                       |
| 93   | LIPF021 | HCC    | 1.86              | 1.32           | N                       |
| 94   | LIPF025 | HCC    | 3.09              | 1.05           | N                       |
| 95   | LIPF028 | HCC    | 1.41              | 1.22           | N                       |
| 96   | LIPF037 | HCC    | 2.13              | 1.14           | N                       |
| 97   | LIPF039 | HCC    | 3.35              | 1.02           | N                       |
| 98   | LIPF048 | HCC    | 1.77              | 1.19           | N                       |
| 99   | LIPF067 | HCC    | 5.06              | 1.33           | N                       |
| 100  | LIPF086 | HCC    | 1.67              | 1.13           | N                       |
| 101  | LIPF088 | HCC    | 1.84              | 0.8            | N                       |
| 102  | LIPF099 | HCC    | 1.53              | 1.06           | N                       |
| 103  | LIPF134 | HCC    | 1.46              | 0.97           | N                       |
| 104  | LIPF139 | HCC    | 2.82              | 0.57           | N                       |
| 105  | LIPF143 | HCC    | 1.017             | 0.92           | N                       |
| 106  | LIPF159 | HCC    | 1.77              | 1.17           | N                       |
| 107  | LIPF166 | HCC    | 1.89              | 1.09           | N                       |
| 108  | LIPF177 | HCC    | 1.25              | 1.09           | N                       |
| 109  | LIPF181 | HCC    | 0.623             | 0.9            | N                       |
| 110  | LIPF185 | HCC    | 2.88              | 0.97           | N                       |
| 111  | LIPF191 | HCC    | 1.76              | 0.93           | N                       |
| 112  | LIPF210 | HCC    | 30.2              | 8.43           | P                       |
| 113  | LIPF233 | HCC    | 1.95              | 1.06           | N                       |
| 114  | LIPF236 | HCC    | 1.65              | 1              | N                       |
| 115  | LIPF239 | HCC    | 0.943             | 0.72           | N                       |
| 116  | LIPF245 | HCC    | 1.63              | 0.96           | N                       |
| 117  | LIPF250 | HCC    | 1.297             | 1.02           | N                       |

| Code | Model   | Tissue | MET CN (ddPCR) | MET/CEP7 ratio | Positive/Negative (P/N) |
|------|---------|--------|----------------|----------------|-------------------------|
| 118  | LIPF280 | HCC    | 1.73           | 1.09           | N                       |
| 119  | GAPF006 | GC     | 1.416          | 1.06           | N                       |
| 120  | GAPF008 | GC     | 2.16           | 1.08           | N                       |
| 121  | GAPF012 | GC     | 7.54           | 1.11           | N                       |
| 122  | GAPF015 | GC     | 1.92           | 1.06           | N                       |
| 123  | GAPF016 | GC     | 3.23           | 1.19           | N                       |
| 124  | GAPF023 | GC     | 3.22           | 1.14           | N                       |
| 125  | GAPF027 | GC     | 2.87           | 1.07           | N                       |
| 126  | GAPF038 | GC     | 1.7            | 1              | N                       |
| 127  | GAPF039 | GC     | 2.35           | 1.17           | N                       |
| 128  | GAPF041 | GC     | 1.258          | 1.03           | N                       |
| 129  | GAPF047 | GC     | 1.034          | 1.06           | N                       |
| 130  | GAPF048 | GC     | 3.4            | 1.07           | N                       |
| 131  | GAPF054 | GC     | 1.617          | 1              | N                       |
| 132  | GAPF077 | GC     | 2.74           | 1.02           | N                       |
| 133  | GAPF084 | GC     | 0.264          | 0.98           | N                       |
| 134  | GAPF089 | GC     | 1.81           | 0.84           | N                       |
| 135  | GAPF094 | GC     | 1.379          | 1.06           | N                       |
| 136  | GAPF097 | GC     | 1.31           | 1              | N                       |
| 137  | GAPF108 | GC     | 2.12           | 1.06           | N                       |
| 138  | GAPF113 | GC     | 1.105          | 0.99           | N                       |
| 139  | GAPF114 | GC     | 5.35           | 1.17           | N                       |
| 140  | GAPF129 | GC     | 3.2            | 1.08           | N                       |
| 141  | GAPF140 | GC     | 1.146          | 1.09           | N                       |
| 142  | GAPF155 | GC     | 1.76           | 1.06           | N                       |
| 143  | GAPF157 | GC     | 1.144          | 1.05           | N                       |
| 144  | GAPF159 | GC     | 1.233          | 0.72           | N                       |
| 145  | GAPF302 | GC     | 1.57           | 1.03           | N                       |
| 146  | GAPF313 | GC     | 1.61           | 1.13           | N                       |
| 147  | GAPF314 | GC     | 1.93           | 1.19           | N                       |
| 148  | GAPF329 | GC     | 1.02           | 0.96           | N                       |
| 149  | GAPF346 | GC     | 2.34           | 0.98           | N                       |
| 150  | GAPF378 | GC     | 1.54           | 1.03           | N                       |
| 151  | GAPF380 | GC     | 1.45           | 1.06           | N                       |
| 152  | GAPF387 | GC     | 2.9            | 1.07           | N                       |
| 153  | GAPF406 | GC     | 1.006          | 0.92           | N                       |
| 154  | GAPF407 | GC     | 1.32           | 0.98           | N                       |
| 155  | GAPF414 | GC     | 1.91           | 0.96           | N                       |
